# Supplementary material for: Theoretical and experimental determination of the number of water molecules breaking the structure of a glycine-based ionic liquid
Source: Royal Society of Chemistry journal article supplement (doi:10.1039/c3ra47410k), 2014-01-01
Supplement: c3ra47410k.pdf [file c3ra47410k.pdf]

**Table S1** AMBER force field parameters for [emim][Gly]/H<sub>2</sub>O mixture.<sup>a</sup>

| nonbonded parameters |                                                      |                | nonbonded parameters |                                                      |                                    |                |     |
|----------------------|------------------------------------------------------|----------------|----------------------|------------------------------------------------------|------------------------------------|----------------|-----|
| Atom                 | $\epsilon_{ii}$ (kJ·mol <sup>-1</sup> )              | $r_{ii}$ (Å)   | Atom                 | $\epsilon_{ii}$ (kJ·mol <sup>-1</sup> )              | $r_{ii}$ (Å)                       |                |     |
| CR                   | 0.3598                                               | 1.908          | H1                   | 0.0657                                               | 1.387                              |                |     |
| NA                   | 0.7113                                               | 1.824          | H                    | 0.0657                                               | 0.600                              |                |     |
| CW                   | 0.3598                                               | 1.908          | CT                   | 0.4577                                               | 1.908                              |                |     |
| H4                   | 0.0628                                               | 1.409          | C                    | 0.3598                                               | 1.908                              |                |     |
| H5                   | 0.0628                                               | 1.000          | O2                   | 0.8786                                               | 1.661                              |                |     |
| CT                   | 0.4561                                               | 1.908          | N3                   | 0.7113                                               | 1.875                              |                |     |
| H1                   | 0.0669                                               | 1.387          | OW                   | 0.6360                                               | 1.7683                             |                |     |
| HC                   | 0.0669                                               | 1.487          | HW                   | 0.0000                                               | 0.0001                             |                |     |
| bonds                | $K_r$ (kJ·mol <sup>-1</sup> ·Å <sup>2</sup> )        | $r_0$ (Å)      | bonds                | $K_r$ (kJ·mol <sup>-1</sup> ·Å <sup>2</sup> )        | $r_0$ (Å)                          |                |     |
| CT-CT                | 1297                                                 | 1.53           | CW-CW                | 1715                                                 | 1.34                               |                |     |
| CT-H1                | 1423                                                 | 1.08           | CT-HC                | 1423                                                 | 1.09                               |                |     |
| CW-H4                | 1611                                                 | 1.07           | CT-C                 | 1326                                                 | 1.55                               |                |     |
| CR-H5                | 1590                                                 | 1.07           | CT-N3                | 1536                                                 | 1.46                               |                |     |
| CR-NA                | 1674                                                 | 1.33           | C-O2                 | 2092                                                 | 1.24                               |                |     |
| CW-NA                | 1506                                                 | 1.38           | N3-H                 | 1883                                                 | 1.00                               |                |     |
| CT-NA                | 1172                                                 | 1.47           | OW-HW                | 2314                                                 | 0.96                               |                |     |
| angles               | $K_\theta$ (kJ·mol <sup>-1</sup> ·rad <sup>2</sup> ) | $\theta$ (deg) | angles               | $K_\theta$ (kJ·mol <sup>-1</sup> ·rad <sup>2</sup> ) | $\theta$ (deg)                     |                |     |
| CT-CT-H1             | 158.992                                              | 109.5          | H4-CW-NA             | 125.980                                              | 122.1                              |                |     |
| CT-CT-HC             | 155.017                                              | 109.5          | H5-CR-NA             | 125.980                                              | 125.7                              |                |     |
| CT-CT-NA             | 293.006                                              | 112.2          | CW-CW-H4             | 125.980                                              | 130.7                              |                |     |
| H1-CT-H1             | 145.980                                              | 109.5          | C-CT-N3              | 376.811                                              | 116.46                             |                |     |
| HC-CT-HC             | 142.005                                              | 109.5          | C-CT-H1              | 242.839                                              | 108.05                             |                |     |
| H1-CT-NA             | 229.994                                              | 109.5          | N3-CT-H1             | 251.207                                              | 108.84                             |                |     |
| CW-NA-CT             | 208.991                                              | 125.7          | CT-C-O2              | 334.971                                              | 115.44                             |                |     |
| CR-NA-CT             | 208.991                                              | 126.3          | O2-C-O2              | 355.891                                              | 129.11                             |                |     |
| CW-CW-NA             | 501.996                                              | 107.0          | CT-N3-H              | 209.367                                              | 107.34                             |                |     |
| CR-NA-CW             | 501.996                                              | 108            | H-N3-H               | 209.367                                              | 103.38                             |                |     |
| NA-CR-NA             | 501.996                                              | 109.9          | HW-OW-HW             | 418.400                                              | 105.07                             |                |     |
| Proper Torsions      |                                                      |                |                      |                                                      |                                    |                |     |
| torsions             | $K_\phi/2$ (kJ·mol <sup>-1</sup> )                   | $\gamma$ (deg) | $n$                  | torsions                                             | $K_\phi/2$ (kJ·mol <sup>-1</sup> ) | $\gamma$ (deg) | $n$ |
| NA-CR-NA-CW          | 50.208                                               | 180            | 2                    | NA-CT-CT-HC                                          | 0.669                              | 0              | 3   |
| NA-CR-NA-CT          | 8.368                                                | 180            | 2                    | H1-CT-CT-HC                                          | 0.628                              | 0              | 3   |
| H5-CR-NA-CW          | 6.276                                                | 180            | 2                    | HC-CT-CT-HC                                          | 0.628                              | 0              | 3   |
| H5-CR-NA-CT          | 6.276                                                | 180            | 2                    | H1-CT-NA-CW                                          | 1.004                              | 0              | 3   |
| CW-CW-NA-CR          | 50.208                                               | 180            | 2                    | H1-CT-NA-CR                                          | 0.686                              | 0              | 3   |
| CW-CW-NA-CT          | 8.368                                                | 180            | 2                    | CT-CT-NA-CW                                          | -0.745                             | 0              | 1   |
| H4-CW-NA-CR          | 8.368                                                | 180            | 2                    | CT-CT-NA-CR                                          | -0.987                             | 0              | 1   |
| H4-CW-NA-CT          | 6.276                                                | 180            | 2                    | N3-CT-C-O2                                           | 0.962                              | 0              | 2   |
| NA-CW-CW-H4          | 6.276                                                | 180            | 2                    | H1-CT-C-O2                                           | 0.000                              | 0              | 2   |
| NA-CW-CW-NA          | 50.208                                               | 180            | 2                    | H1-CT-N3-H                                           | 0.921                              | 0              | 3   |
| H4-CW-CW-H4          | 6.276                                                | 180            | 2                    |                                                      |                                    |                |     |

|             |       | Improper Torsions |   |             |        |     |   |
|-------------|-------|-------------------|---|-------------|--------|-----|---|
| NA-NA-CR-H5 | 4.598 | 180               | 2 | CR-CW-NA-CT | 8.368  | 180 | 2 |
| CW-NA-CW-H4 | 4.598 | 180               | 2 | CT-O2-C-O2  | 43.932 | 180 | 2 |

<sup>a</sup>The labels of atoms refer to those used in Scheme 1.

**Table S2** Values of surface tension,  $\gamma$  ( $10^3$ ,  $\text{N}\cdot\text{m}^{-1}$ ), of ionic liquid [emim][Gly] of contained various amount of water.

| $w_{\text{H}_2\text{O}}^{\text{a}}$ | 0.7693 % | 0.9243 % | 1.0799 % | 1.2277 % | 1.3773 | 0    | <i>r</i> | <i>s</i> |
|-------------------------------------|----------|----------|----------|----------|--------|------|----------|----------|
| $\gamma$                            | 54.9     | 55.2     | 55.5     | 55.8     | 56.0   | 53.5 | 0.998    | 0.03     |

<sup>a</sup>  $w_{\text{H}_2\text{O}}$  is the water mass fraction

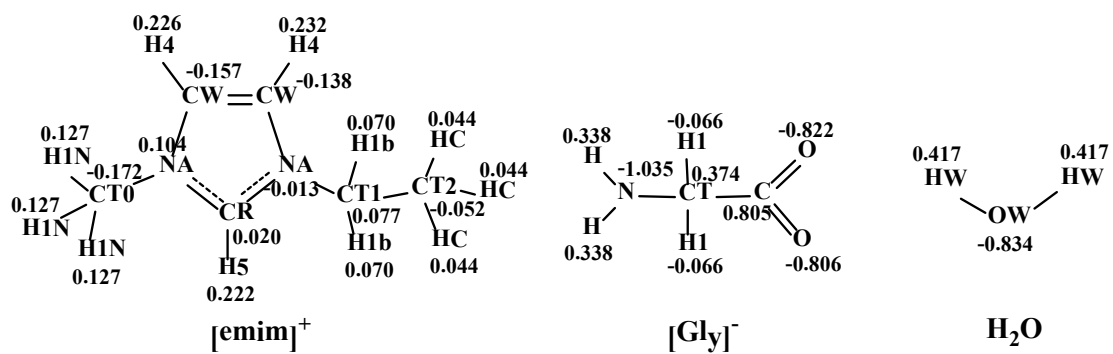

Fig. S1 RESP charge for [emim]<sup>+</sup>, [Gly]<sup>-</sup> and H<sub>2</sub>O.

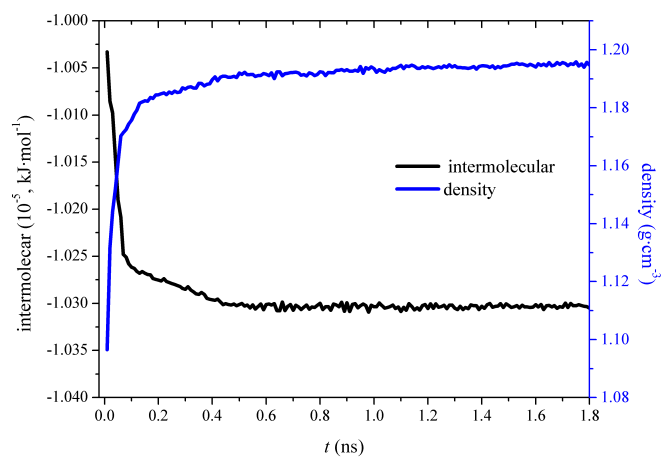

**Fig. S2** The evolution of the pure [emim][Gly] system as a function of time.

Section A  $^1\text{H}$  NMR spectra

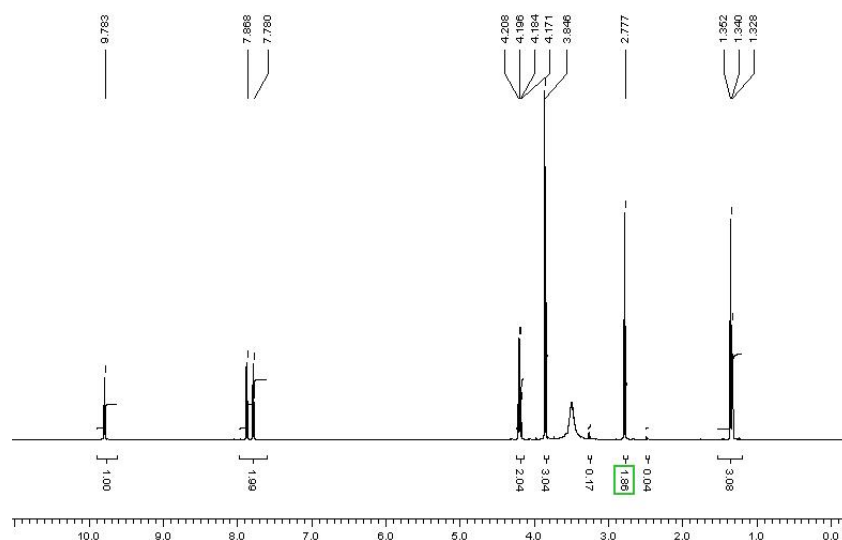

The  $^1\text{H}$  NMR spectrum  $\delta_{\text{H}}$  (300 MHz, DMSO) of IL [emim][Gly]

| chemical shift    | hydrogen number | radical                   | chemical shift    | hydrogen number |                     |
|-------------------|-----------------|---------------------------|-------------------|-----------------|---------------------|
| 1.328 ~ 1.352 (t) | 3               | $\text{NCH}_2\text{CH}_3$ | 7.780 ~ 7.785 (d) | 1               | <b>C(4)<i>H</i></b> |
| 2.777(s)          | 2               | $\text{NH}_2\text{CH}_2$  | 7.863 ~ 7.868 (d) | 1               | <b>C(5)<i>H</i></b> |
| 3.846 (s)         | 3               | $\text{NCH}_3$            | 9.783 (s)         | 1               | <b>C(2)<i>H</i></b> |
| 4.171 ~ 4.208 (m) | 2               | $\text{NCH}_2$            |                   |                 |                     |

Section B DSC trace of IL [emim][Gly]. Calorimetric data were obtained with a differential scanning calorimeter DSC (Mettler-Toledo Co., Switzerland). The temperature range was  $-120 \sim 140$  °C with heating rate of  $10^\circ\text{C}/\text{min}$ . Then samples were incubated at  $-120$  °C for 5 min and were then heated to  $140$  °C.

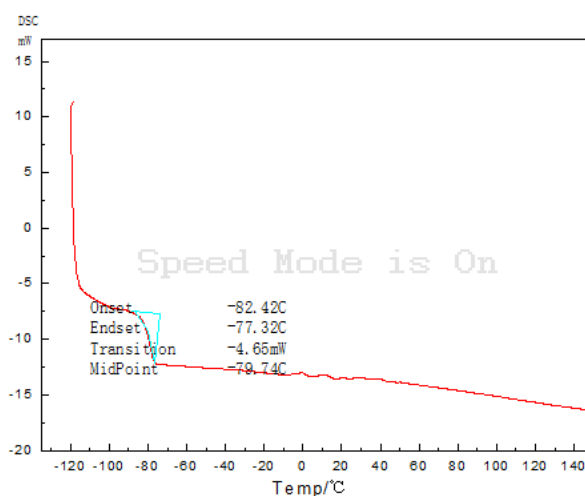

**Fig. S3**  $^1\text{H}$  NMR spectra (section A) and thermal analysis (section B)

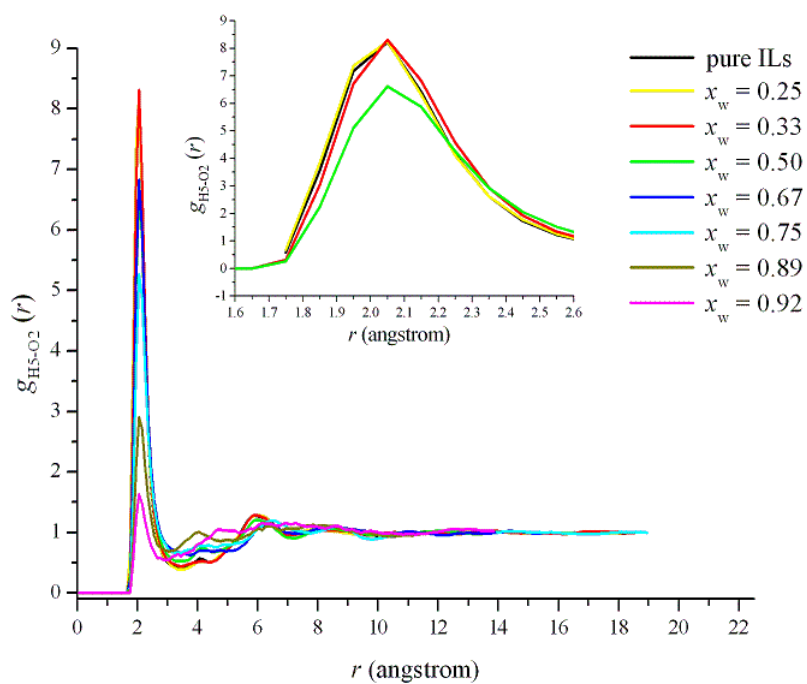

**Fig. S4** Atomic partial radial distribution between H5 atom of [emim]<sup>+</sup> and O2 atom of [Gly]<sup>-</sup>. The focus curves correspond to the different water mole fraction.

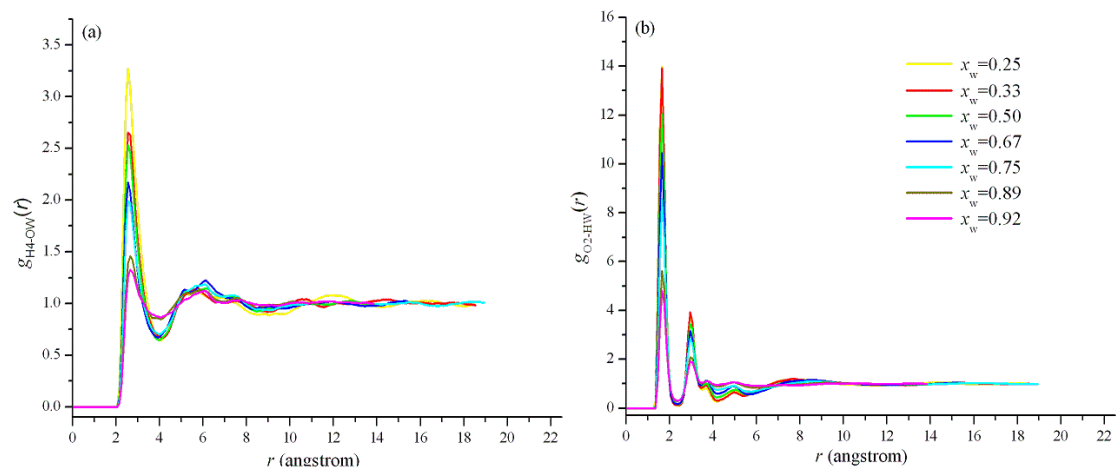

**Fig. S5** Atomic partial radial distribution between H4 atom of  $[\text{emim}]^+$  and OW atom of  $\text{H}_2\text{O}$  (a) and O2 atom of  $[\text{Gly}]^-$  and OW atom of  $\text{H}_2\text{O}$  (b). The focus curves correspond to the different water mole fraction.
